# Supplementary material
Source: PubMed Central journal article supplement (PMC4379045)
Supplement: NIHMS652893-supplement-1.pdf [file NIHMS652893-supplement-1.pdf]

# Supplemental Figure 1

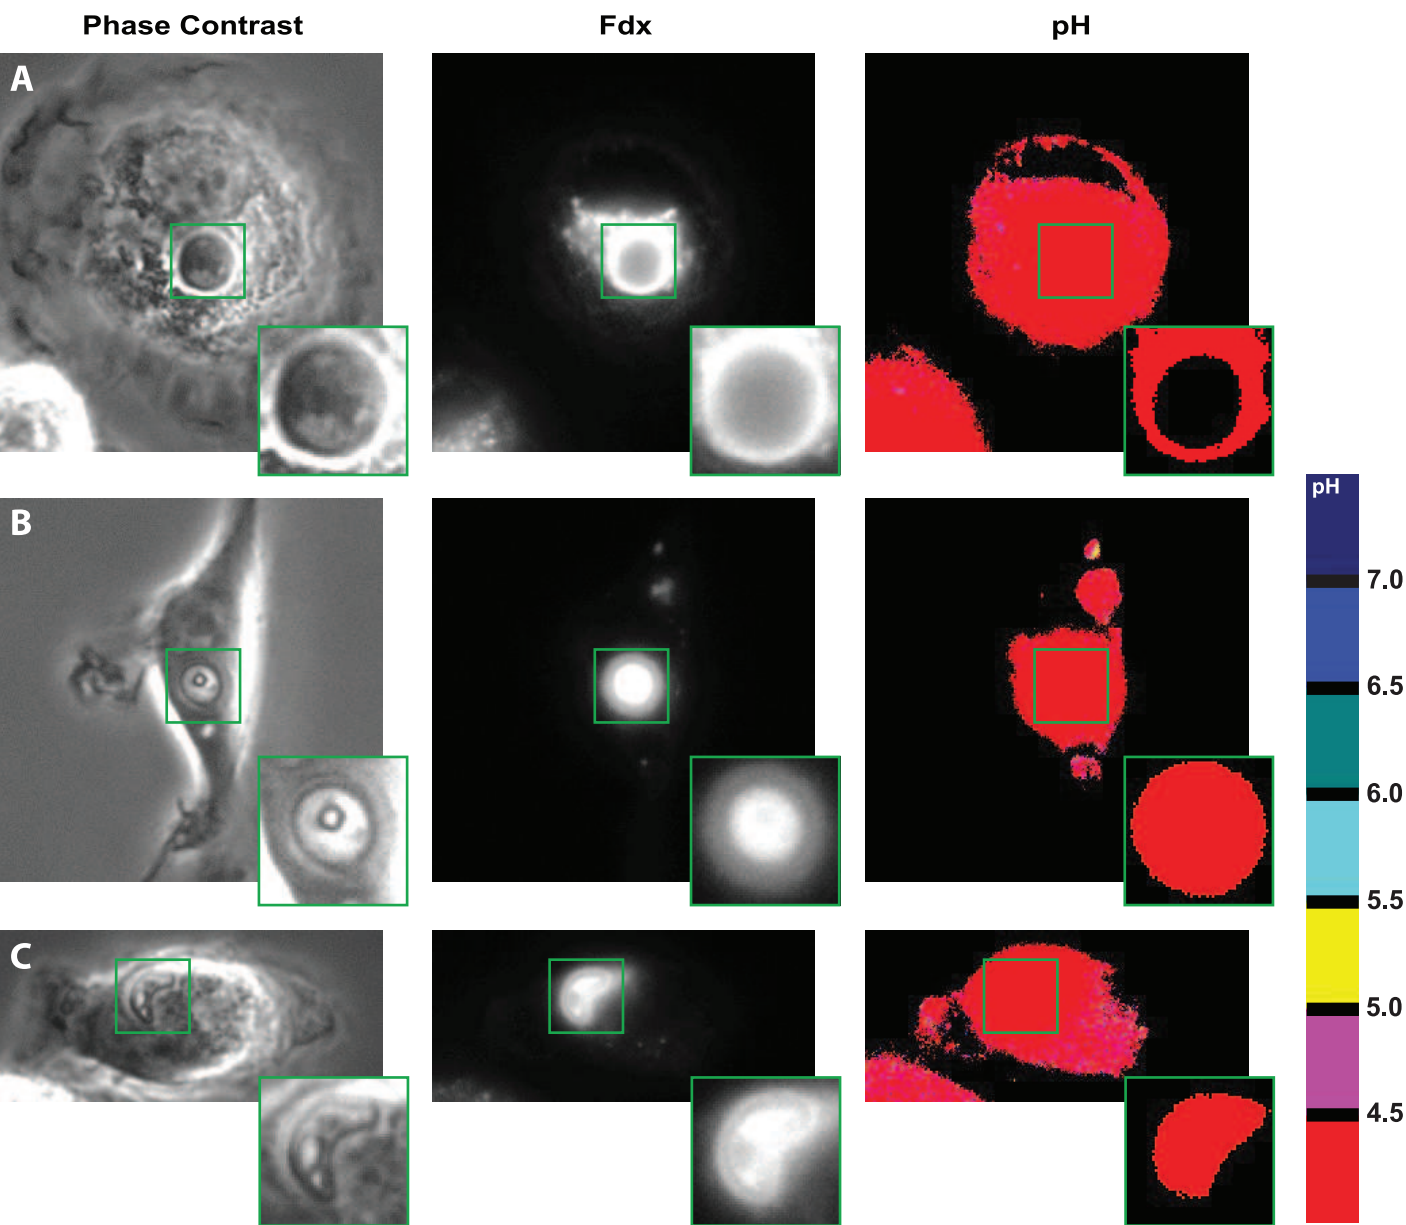

## Supplemental Figure 1. Demonstration of fungicidal activity against intracellular *C. neoformans*.

Fdx-loaded *Cn*-infected BMM were analyzed for *Cn* viability and degradation, based on exclusion of Fdx from the yeast cell interior. A-C are representative images of BMM containing (A) live *Cn*; (B) dead *Cn*; & (C) dead and partially degraded *Cn*. To the lower right of each image in A-C is a digitally enlarged inset of each phagolysosome (bounded by a 7  $\mu\text{m}$  square green box in the original panel). Note that to highlight the organelle morphology a higher fluorescence intensity threshold was utilized for the enlarged pH map images.
